# Supplementary material
Source: publisher figshare collection journal article supplement (https://sage.figshare.com/ndownloader/files/18599003)
Supplement: Supplementary file 1 [file 18599003]

**Supplemental Table 1: Odds Ratios and 95% confidence intervals of participants scoring in the highest 2 categories of SF-36 measures<sup>1</sup>**

| Outcome                                  | Baseline<br>(n = 163) | Month 6<br>(n = 152) | Month 12<br>(n = 146) | Month 18<br>(n = 142) | P value<br>Month<br>6 vs 1 | P value<br>Month<br>12 vs 1 | P value<br>Month<br>18 vs 1 |
|------------------------------------------|-----------------------|----------------------|-----------------------|-----------------------|----------------------------|-----------------------------|-----------------------------|
| General Health                           | 1                     | 2.27 (1.61,3.22)     | 1.93 (1.40,2.66)      | 2.03 (1.38,3.00)      | <.0001                     | <.0001                      | 0.0004                      |
| Bodily Pain <sup>2</sup>                 | 1                     | 1.01 (0.69,1.49)     | 1.10 (0.74,1.64)      | 0.87 (0.59,1.30)      | 0.9472                     | 0.6319                      | 0.5058                      |
| Mental Health                            | 1                     | 2.58 (1.74,3.81)     | 2.25 (1.61,3.14)      | 2.05 (1.44,2.90)      | <.0001                     | <.0001                      | <.0001                      |
| Physical Functioning                     | 1                     | 1.12 (0.42,3.02)     | 1.05 (0.33,3.33)      | 0.92 (0.38,2.27)      | 0.8195                     | 0.9346                      | 0.8606                      |
| Role Limitations due to emotional health | 1                     | 3.57 (1.93,6.62)     | 2.13 (1.21,3.76)      | 1.66 (0.90,3.06)      | <.0001                     | 0.0087                      | 0.1079                      |
| Role limitations due to physical health  | 1                     | 2.73 (1.19,6.23)     | 1.45 (0.74,2.86)      | 1.51 (0.70,3.27)      | 0.0173                     | 0.2805                      | 0.2945                      |
| Social Functioning <sup>3</sup>          | 1                     | 3.84 (1.66,8.90)     | 2.48 (1.17,5.25)      | 1.64 (0.88,3.04)      | 0.0017                     | 0.0173                      | 0.1167                      |
| Vitality                                 | 1                     | 2.84 (1.78,4.53)     | 3.37 (2.15,5.28)      | 3.01 (1.83,4.94)      | <.0001                     | <.0001                      | <.0001                      |

<sup>1</sup>All analyses adjusted for age (years), sex, ethnicity, and worksite. Cut-points for each measure are as follows: general health  $\geq 75$ ; bodily pain  $\geq 75$ ; mental health  $\geq 80$ ; physical functioning  $\geq 75$ ; role limitations due to emotional health  $\geq 66$ ; role limitations due to physical health  $\geq 75$ ; social functioning  $\geq 75$ ; and vitality  $\geq 80$ . Presence in the highest category indicates better health/better outcome (e.g., better general health, less bodily pain, better mental health, etc.).

<sup>2</sup>One question in the bodily pain domain was missing “very mild” as an answer choice.

<sup>3</sup>Generalized estimating equation model did not coverage due to non-positive definite generalized Hessian Matrix. This was due to the large amount of sites and the limited occurrence of non-events. We collapsed worksite groups from 8 to 3 sites to allow for convergence.

Abbreviation: SF-36, Rand 36-Item Short Form Survey.
